# Supplementary figures and images for: Gut Microbial Composition and Liver Metabolite Changes Induced by Ammonia Stress in Juveniles of an Invasive Freshwater Turtle
Source: MDPI journal article supplement (doi:10.3390/biology11091315), 2022-09-05

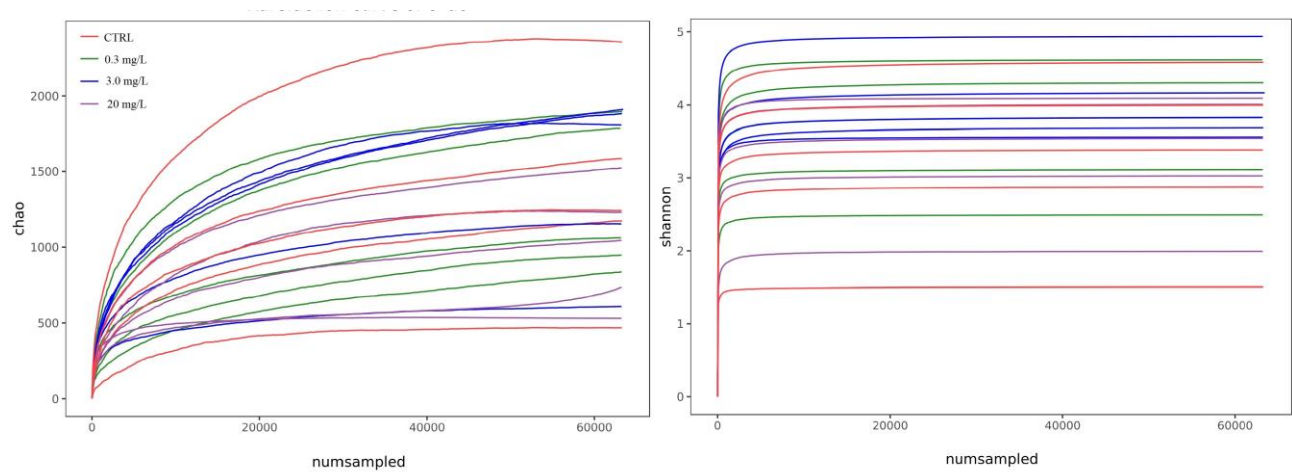

Figure S1: Rarefaction curves of Chao and Shannon--Wiener indexes for all samples.

Supplement: s1 [file s1]
